# Supplementary material for: Perceived Stress and Perceived Lack of Control of Student Teachers in Field Practice Placements in Schools during the COVID-19 Pandemic: Validity of the PSS-10 Adapted to the Field Practice Context
Source: MDPI journal article supplement (doi:10.3390/educsci13100983), 2023-09-26
Supplement: s1 [file s1]

Archive with 2 entries (2 files):
- Supplemental File S1.pdf
- Supplemental File S2.pdf
