# Supplementary material for: Perceived Stress and Perceived Lack of Control of Student Teachers in Field Practice Placements in Schools during the COVID-19 Pandemic: Validity of the PSS-10 Adapted to the Field Practice Context
Source: MDPI journal article supplement (doi:10.3390/educsci13100983), 2023-09-26
Supplement: s1 [file s1 › Supplemental File S1.pdf]

## Supplemental File S1. Additional results

Table S1. *Conditional likelihood ratio tests of LRD and DIF interaction terms in the GLLRMs for the Perceived Stress and Perceived Lack of Control in Field Practice subscales*

| item pairs tested          | CLR   | df | <i>p</i> | $\gamma$ |
|----------------------------|-------|----|----------|----------|
| PSFFP subscale             |       |    |          |          |
| i1 & i2                    | 56.54 | 16 | <0.001   | 0.22     |
| i1 & i9                    | 49.15 | 16 | <0.001   | 0.27     |
| i2 & i3                    | 79.19 | 16 | <0.001   | 0.46     |
| i3 & i6                    | 71.95 | 16 | <0.001   | 0.38     |
| PLCFP subscale             |       |    |          |          |
| i5r & i8r                  | 34.48 | 16 | 0.005    | 0.45     |
| i5r & Field practice level | 22.98 | 8  | 0.003    | 0.37     |

Note. GLLRM = graphical loglinear Rasch model; CLR = conditional likelihood ratio;  $\gamma$  = Goodman and Kruskal's gamma correlation, PSFP = Perceived Stress in Field Practice; PLCFP = Perceived Lack of Control in Field Practice.

Table S2. *DIF-equation table for the Perceived Lack of Control in Field Practice sum score to adjust for level of field practice DIF*

| sum score<br>field practice level I | Equated score<br>field practice level II | Equated score<br>field practice level III |
|-------------------------------------|------------------------------------------|-------------------------------------------|
| 0.00                                | 0.00                                     | 0.00                                      |
| 1.00                                | 0.57                                     | 0.74                                      |
| 2.00                                | 1.52                                     | 1.63                                      |
| 3.00                                | 2.62                                     | 2.56                                      |
| 4.00                                | 3.59                                     | 3.41                                      |
| 5.00                                | 4.50                                     | 4.29                                      |
| 6.00                                | 5.43                                     | 5.25                                      |
| 7.00                                | 6.34                                     | 6.22                                      |
| 8.00                                | 7.26                                     | 7.17                                      |
| 9.00                                | 8.27                                     | 8.21                                      |
| 10.00                               | 9.51                                     | 9.47                                      |
| 11.00                               | 11.00                                    | 11.00                                     |
| 12.00                               | 12.00                                    | 12.00                                     |

Table S3. *Bias introduced to group comparisons of perceived lack of control in field practice by unresolved DIF relative to level of field practice placement*

| level of field practice (n) | observed scores |      | DIF-adjusted scores |      | bias |
|-----------------------------|-----------------|------|---------------------|------|------|
|                             | Mean            | SE   | Mean                | SE   |      |
| Level I (56)                | 3.48            | 0.27 | 3.48                | 0.27 | 0.00 |
| Level II (151)              | 3.44            | 0.16 | 3.02                | 0.15 | 0.42 |
| Level III (152)             | 3.32            | 0.16 | 2.85                | 0.15 | 0.47 |

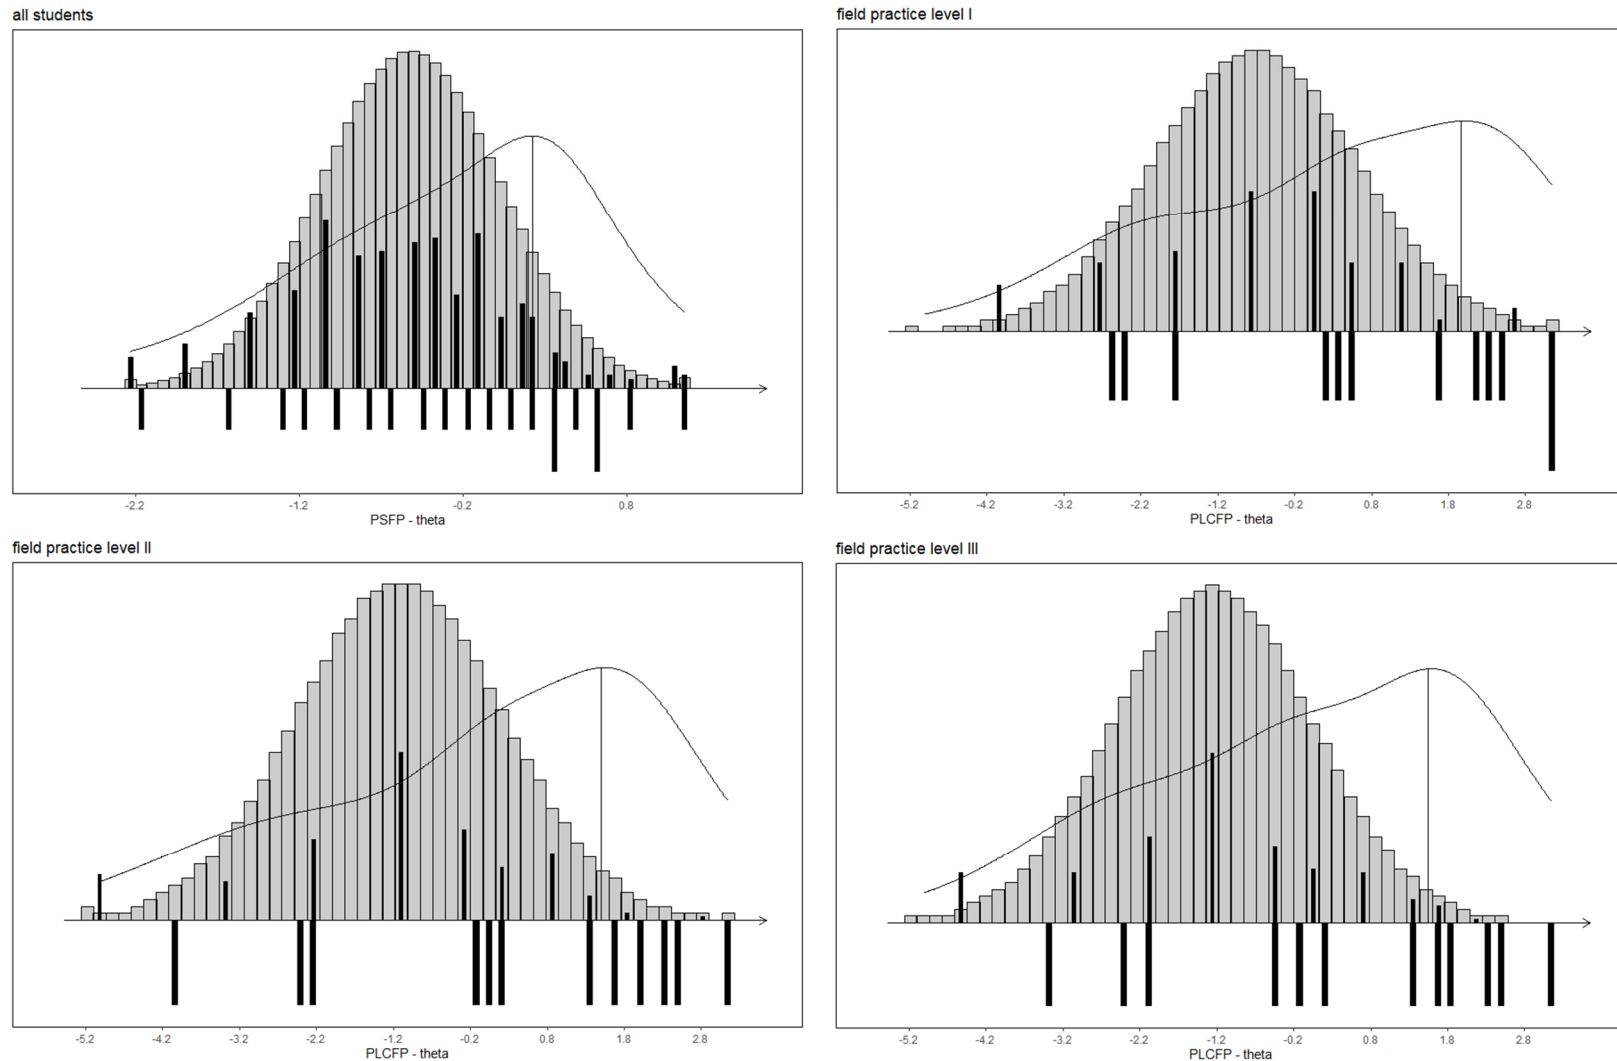

Figure S1. Item maps showing distribution of person parameter estimates and information curve above item threshold locations for the Perceived Stress in Field Practice (top left) and Perceived Lack of Control in Field Practice (top right & and both bottom) subscales. Notes. Person parameters are weighted maximum likelihood estimates and illustrate the distribution of these for the study sample (black bars above the line) and for the population under the assumption of normality (grey bars above the line), as well as the information curve, relative to the distribution of the item thresholds (black bars below the line).
